# Supplementary material for: Isotope‐labeled amyloid‐β does not transmit to the brain in a prion‐like manner after peripheral administration
Source: PubMed Central journal article supplement — EMBO Rep. 2022 May 27;23(7):e54405. doi: 10.15252/embr.202154405 (PMC9253763; doi:10.15252/embr.202154405), 2022-05-27
Supplement: EMBR-23-e54405-s004.pdf [file EMBR-23-e54405-s004.pdf]

# Isotope-labeled amyloid- $\beta$ does not transmit to the brain in a prion-like manner after peripheral administration

Mirjam Brackhan, Giulio Calza, Kristiina Lundgren, Pablo Bascunana, Thomas Brüning, Rabah Soliymani, Rakesh Kumar, Axel Abelein, Marc Baumann, Maciej Lalowski, and Jens Pahnke

DOI: [10.15252/embr.202154405](https://doi.org/10.15252/embr.202154405)

Corresponding author(s): Jens Pahnke ([jens.pahnke@gmail.com](mailto:jens.pahnke@gmail.com))

---

## Review Timeline:

|                     |             |
|---------------------|-------------|
| Submission Date:    | 30th Nov 21 |
| Editorial Decision: | 7th Jan 22  |
| Revision Received:  | 18th Mar 22 |
| Editorial Decision: | 22nd Apr 22 |
| Revision Received:  | 30th Apr 22 |
| Accepted:           | 3rd May 22  |

---

Editor: Esther Schnapp

## Transaction Report:

(Note: With the exception of the correction of typographical or spelling errors that could be a source of ambiguity, letters and reports are not edited. Depending on transfer agreements, referee reports obtained elsewhere may or may not be included in this compilation. Referee reports are anonymous unless the Referee chooses to sign their reports.)

Dear Prof. Pahnke,

Thank you for the submission of your manuscript to EMBO reports. I could only secure two referees for it in December, and we have now received their enclosed reports.

As you will see, the referees acknowledge that the findings are potentially very interesting. However, they do point out that it needs to be clarified whether the injected homogenized samples indeed have amyloidogenic seeding activity, and whether this activity is comparable to the one in related and published studies with opposite results. The referees also raise further points that need to be addressed.

I would thus like to invite you to revise your manuscript with the understanding that the referee concerns must be fully addressed and their suggestions taken on board. Please address all referee concerns in a complete point-by-point response. Acceptance of the manuscript will depend on a positive outcome of a second round of review. It is EMBO reports policy to allow a single round of major revision only and acceptance or rejection of the manuscript will therefore depend on the completeness of your responses included in the next, final version of the manuscript.

We realize that it is difficult to revise to a specific deadline. In the interest of protecting the conceptual advance provided by the work, we recommend a revision within 3 months (9th Apr 2022). Please discuss the revision progress ahead of this time with the editor if you require more time to complete the revisions.

You can either publish the study as a short report or as a full article. For short reports, the revised manuscript should not exceed 27,000 characters (including spaces but excluding materials & methods and references) and 5 main plus 5 expanded view figures. The results and discussion sections must further be combined, which will help to shorten the manuscript text by eliminating some redundancy that is inevitable when discussing the same experiments twice. For a normal article there are no length limitations, but it should have more than 5 main figures and the results and discussion sections must be separate. In both cases, the entire materials and methods should be included in the main manuscript file.

**IMPORTANT NOTE:** we perform an initial quality control of all revised manuscripts before re-review. Your manuscript will FAIL this control and the handling will be DELAYED if the following APPLIES:

- 1) A data availability section providing access to data deposited in public databases is missing. If you have not deposited any data, please add a sentence to the data availability section that explains that.
- 2) Your manuscript contains statistics and error bars based on  $n=2$ . Please use scatter blots in these cases. No statistics should be calculated if  $n=2$ .

When submitting your revised manuscript, please carefully review the instructions that follow below. Failure to include requested items will delay the evaluation of your revision.

1) a .docx formatted version of the manuscript text (including legends for main figures, EV figures and tables). Please make sure that the changes are highlighted to be clearly visible.

2) individual production quality figure files as .eps, .tif, .jpg (one file per figure). See [https://wol-prod-cdn.literatumonline.com/pb-assets/embo-site/EMBOPress\\_Figure\\_Guidelines\\_061115-1561436025777.pdf](https://wol-prod-cdn.literatumonline.com/pb-assets/embo-site/EMBOPress_Figure_Guidelines_061115-1561436025777.pdf) for more info on how to prepare your figures.

3) We replaced Supplementary Information with Expanded View (EV) Figures and Tables that are collapsible/expandable online. A maximum of 5 EV Figures can be typeset. EV Figures should be cited as "Figure EV1, Figure EV2" etc... in the text and their respective legends should be included in the main text after the legends of regular figures.

- For the figures that you do NOT wish to display as Expanded View figures, they should be bundled together with their legends in a single PDF file called \*Appendix\*, which should start with a short Table of Content. Appendix figures should be referred to in the main text as: "Appendix Figure S1, Appendix Figure S2" etc. See detailed instructions regarding expanded view here: <https://www.embopress.org/page/journal/14693178/authorguide#expandedview>

- Additional Tables/Datasets should be labeled and referred to as Table EV1, Dataset EV1, etc. Legends have to be provided in a separate tab in case of .xls files. Alternatively, the legend can be supplied as a separate text file (README) and zipped together with the Table/Dataset file.

4) a .docx formatted letter INCLUDING the reviewers' reports and your detailed point-by-point responses to their comments. As part of the EMBO Press transparent editorial process, the point-by-point response is part of the Review Process File (RPF), which will be published alongside your paper.

5) a complete author checklist, which you can download from our author guidelines <https://www.embopress.org/page/journal/14693178/authorguide>. Please insert information in the checklist that is also

reflected in the manuscript. The completed author checklist will also be part of the RPF.

6) Please note that all corresponding authors are required to supply an ORCID ID for their name upon submission of a revised manuscript (<<https://orcid.org/>>). Please find instructions on how to link your ORCID ID to your account in our manuscript tracking system in our Author guidelines <<https://www.embopress.org/page/journal/14693178/authorguide#authorshipguidelines>>

7) Before submitting your revision, primary datasets produced in this study need to be deposited in an appropriate public database (see <https://www.embopress.org/page/journal/14693178/authorguide#datadeposition>). Please remember to provide a reviewer password if the datasets are not yet public. The accession numbers and database should be listed in a formal "Data Availability" section placed after Materials & Method (see also <https://www.embopress.org/page/journal/14693178/authorguide#datadeposition>). Please note that the Data Availability Section is restricted to new primary data that are part of this study. \* Note - All links should resolve to a page where the data can be accessed. \*  
If your study has not produced novel datasets, please mention this fact in the Data Availability Section.

8) We would also encourage you to include the source data for figure panels that show essential data. Numerical data should be provided as individual .xls or .csv files (including a tab describing the data). For blots or microscopy, uncropped images should be submitted (using a zip archive if multiple images need to be supplied for one panel). Additional information on source data and instruction on how to label the files are available at <<https://www.embopress.org/page/journal/14693178/authorguide#sourcedata>>.

9) Our journal also encourages inclusion of \*data citations in the reference list\* to directly cite datasets that were re-used and obtained from public databases. Data citations in the article text are distinct from normal bibliographical citations and should directly link to the database records from which the data can be accessed. In the main text, data citations are formatted as follows: "Data ref: Smith et al, 2001" or "Data ref: NCBI Sequence Read Archive PRJNA342805, 2017". In the Reference list, data citations must be labeled with "[DATASET]". A data reference must provide the database name, accession number/identifiers and a resolvable link to the landing page from which the data can be accessed at the end of the reference. Further instructions are available at <https://www.embopress.org/page/journal/14693178/authorguide#referencesformat>

10) Regarding data quantification (see Figure Legends:  
<https://www.embopress.org/page/journal/14693178/authorguide#figureformat>)

The following points must be specified in each figure legend:

- the name of the statistical test used to generate error bars and P values,
- the number (n) of independent experiments (please specify technical or biological replicates) underlying each data point,
- the nature of the bars and error bars (s.d., s.e.m.),
- If the data are obtained from n {less than or equal to} 2, use scatter blots showing the individual data points.

Discussion of statistical methodology can be reported in the materials and methods section, but figure legends should contain a basic description of n, P and the test applied.

- Please also include scale bars in all microscopy images.

We would also welcome the submission of cover suggestions, or motifs to be used by our Graphics Illustrator in designing a cover.

As part of the EMBO publication's Transparent Editorial Process, EMBO reports publishes online a Review Process File (RPF) to accompany accepted manuscripts. This File will be published in conjunction with your paper and will include the referee reports, your point-by-point response and all pertinent correspondence relating to the manuscript.

You are able to opt out of this by letting the editorial office know ([emboreports@embo.org](mailto:emboreports@embo.org)). If you do opt out, the Review Process File link will point to the following statement: "No Review Process File is available with this article, as the authors have chosen not to make the review process public in this case."

I look forward to seeing a revised form of your manuscript when it is ready. Please use this link to submit your revision:  
<https://embor.msubmit.net/cgi-bin/main.plex>

Best regards,  
Esther

Esther Schnapp, PhD  
Senior Editor  
EMBO reports

Referee #1:

Brackhan et al investigated whether the peripheral administration of amyloid-beta ( $A\beta$ ) peptides can contribute to cerebral  $\beta$ -amyloidosis.

The authors performed in vivo stable isotope labelling of brain-derived material (including  $A\beta$ ) by feeding transgenic (APP/PS1 model) and non-transgenic mice with a  $^{13}C$ -lysine labelled diet. Of relevance, in initial experiments the transgenic animals were labelled for 50, 100 or 125 days; while the controls were labelled for only 10 days. However, in a second set of experiments (more informative) metabolic labelling time was similar in both groups.

Labelled brain extracts were prepared from the transgenic and control mice and injected (i.p.) into male (APP/PS1) transgenic animals. The brain, mesenteric lymph nodes, spleen and liver were harvested at different time points (1-100 days post-injection) and homogenate samples were spiked with femtomolar quantities of labelled ( $^{13}C^{15}N$ -Lys)  $A\beta_{42}$  prior to immunoprecipitation and analysis by multiple reaction monitoring immuno-mass spectrometry (MRM-IMS). Importantly, the authors established a sensible MS methodology for the detection of  $A\beta$  peptides, using the tryptic  $A\beta_{17-28}$  peptide as a surrogate measure for total  $A\beta$ .

The authors first traced intraperitoneally-injected  $A\beta$ . Their analyses showed that  $A\beta$  reaches the liver, spleen and the mesenteric lymph nodes via lymphatic drainage. Interestingly, labelled  $A\beta_{17-28}$  peptide was detected at 1-day post-injection in the insoluble brain fractions of both groups of mice. The analyses indicate that the transgenic mice rapidly metabolized  $^{13}C$ -Lys from the donor extracts and incorporated the labelled essential amino acid into the de novo generated  $A\beta$ . Therefore, in contrast to previous studies, the data do not support the notion that labelled  $A\beta$ , from peripheral injections, actually enters the brain. The authors conclude that these findings argue against the transmission of cerebral  $A\beta$  pathology via peripheral administration of  $A\beta$  aggregates.

This reviewer finds the presented data relevant and interesting. The high sensitivity of the developed methodology for the detection of labelled  $A\beta$  supports the robustness of the observations and conclusions.

Main comment:

1- As mentioned in the discussion, the results are in conflict with previous reports; including the recent study by Morales et al (2021) which uses very similar methodology in the investigation of induced cerebral  $A\beta$  pathology following peripheral administration of misfolded  $A\beta$ .

The authors indicate that "Our findings imply that accelerated cerebral  $\beta$ -amyloidosis previously observed after peripheral injection of  $A\beta$ -containing brain extract or blood into APPtg mouse models (Burwinkel et al., 2018; Eisele et al., 2014; Eisele et al., 2010; Morales et al., 2021; Morales et al., 2020) was caused by other factors present in the donor material rather than by seeding from the periphery."

And suggest for instance inflammatory factors.

However, this reviewer wonders whether the type of ' $A\beta$  seeds' injected in the different studies differ and may explain the discrepancies. Have the authors tested the amyloidogenic (seeding) activity of the homogenate samples that were injected? How do they compare to other reported seeds?

In Morales et al (2021), samples derived from an Alzheimer's (AD) brains were used in the studies. Have the authors tested the seeding activity of the used extracts with those derived from the AD human brain. The authors should convincingly demonstrate that the injected fractions are 'biologically active' in regards to their seeding activity.

Referee #2:

This report is a tour-de-force of a very important, but challenging, question: does peripheral amyloid-beta get into the CNS or contribute to the risk of CNS amyloidosis?

The authors use a series of advanced techniques to address this question at multiple levels and should be congratulated on a thoughtful and thorough approach.

Major critiques are:

1) The results and discussion of peripheral amounts and locations of injected amyloid don't directly address the hypothesis framed by this manuscript, but do provide additional information on where injected amyloid goes in cellular components. The authors could consider making these descriptions supplemental or secondary to the main CNS findings. For example, the description of Amyloid-beta 42 detected in mononuclear cells after IP injection of unlabeled tg and non-tg brain homogenates adds little to the discussion. Because endogenous, murine Amyloid-beta is produced at much lower levels than in

APP/PS1 transgenic mice, it seems surprising that "In blood plasma, A $\beta$ 42 levels were comparable between mice injected with APPtg brain extract and those injected with non-tg brain extract at all time points". This should be more directly addressed - why isn't it higher from tg tissues with much higher amyloid amounts?

Because the main hypothesis, 'does IP-injected amyloid-beta reach the brain and imply transmissibility similar to prion diseases', doesn't need the measurements in blood plasma to be complete, the authors could simply move the part of the paragraph that begins, "In blood plasma". . . ) to supplemental.

Additionally, the results hypothesize about how the IP injection is cleared from the peritoneum, but don't fully describe the exact identity of the "peritoneal cells": were these mesothelial cells? Macrophages? Lymphocytes? Other? Similarly, the "mononuclear cells" in the blood plasma. In addition, we know that amyloid-beta in blood plasma can be transported via binding to soluble transport proteins such as LRP-1 (see work by zlokovic), so simply measuring the amount of the peptide in cells does not necessarily capture the entire amount in plasma. These should all be added to supplement or discussion.

2) the tg and non-tg groups were administered different durations of the stable isotope-labeled diet for the main experiments, acknowledging that the authors did, in later experiments, administer the diet for 100 d to non-tg mice to match the labeled diet duration of the original group of tg mice. The authors should move the findings of the non-tg mouse group fed the labeled diet for only 10 days to supplement clearly identifying the difference in labeling as not being comparable. Figure 4G seems to provide some of the most convincing evidence that the labeled amino acid, but not the peptide, is being taken up and incorporated (hence not supporting the hypothesis that amyloid-beta in the periphery enters the brain).

3) the hypothesis that proteases in the liver help break down amyloid-beta seems unnecessary and unproven (most protein catabolism occurs in the stomach and small intestine), and at most should be included as a speculation in discussion.

4) the absolute lack of <sup>13</sup>C-labeled Lys in the soluble (TBS) fraction (Figure 4A) as opposed to the unlabeled 17-28 fragment seems odd when it is apparent in the insoluble fraction rather quickly (1 d). The overall proportion of soluble vs. insoluble amyloid beta is generally low - so maybe it was simply the limit of detection in this case? The authors should explain this apparent discrepancy.

Minor critiques are:

1) a parallel analysis of other proteins that would have incorporated the <sup>13</sup>CLys would help support this claim that <sup>13</sup>CLys is transported via bloodstream to the brain as an amino acid, where in the brain itself, it is incorporated into a variety of proteins as they are synthesized. Can the authors search their mass spec data and find labeled signatures of other proteins (e.g. apolipoprotein E, which is present in abundant amounts - see <https://doi.org/10.1371/journal.pone.0038013> )?

2) Consider expanding, with perhaps a Figure illustrating the phenomenon, of the finding that stable-isotope labeling in these Tg mice confirms the findings of the Michno et al 2021 study: in preparation of the labeled homogenates, the authors also noted that the earlier labeling begins, the lower the amount of insoluble A $\beta$  that is not subject to dynamic turnover, and the higher the label incorporation into A $\beta$ , which highlights the importance of an early start of therapies promoting A $\beta$  clearance - showing that label incorporation into A $\beta$  is highest when labeling starts before plaque onset.

3) Although peak intensity of the amyloid-beta 17-28 fragment was highest and therefore chosen as a surrogate for total amyloid-beta, considering choosing the second most intense peak and analyzing it in parallel (perhaps a fragment with the Lys at position 16 as well as C-terminal end at 42)

EMBOR-2021-54405V1

Esther Schnapp, PhD  
Senior Editor  
EMBO reports

### Response to Reviewers

We thank the reviewers and the editor for their thorough review of our article "Tracking peripherally administered amyloid- $\beta$  by stable isotope labeling-based proteomics". The insightful comments have facilitated the revision of the manuscript.

Please find accompanying the revised manuscript, figures and tables. New insertions are shown in red. The point-by-point response to reviews follows. Text in red below indicates new insertions. Page and line refer to the revised draft.

#### Referee #1:

Brackhan et al. investigated whether the peripheral administration of amyloid-beta ( $A\beta$ ) peptides can contribute to cerebral  $\beta$ -amyloidosis.

The authors performed in vivo stable isotope labelling of brain-derived material (including  $A\beta$ ) by feeding transgenic (APP/PS1 model) and non-transgenic mice with a  $^{13}C$ -lysine labelled diet. Of relevance, in initial experiments the transgenic animals were labelled for 50, 100 or 125 days; while the controls were labelled for only 10 days. However, in a second set of experiments (more informative) metabolic labelling time was similar in both groups.

Labelled brain extracts were prepared from the transgenic and control mice and injected (i.p.) into male (APP/PS1) transgenic animals. The brain, mesenteric lymph nodes, spleen and liver were harvested at different time points (1-100 days post-injection) and homogenate samples were spiked with femtomolar quantities of labelled ( $^{13}C^{15}N$  Lys)  $A\beta_{42}$  prior to immunoprecipitation and analysis by multiple reaction monitoring immuno-mass spectrometry (MRM-IMS). Importantly, the authors established a sensible MS methodology for the detection of  $A\beta$  peptides, using the tryptic  $A\beta_{17-28}$  peptide as a surrogate measure for total  $A\beta$ .

The authors first traced intraperitoneally-injected  $A\beta$ . Their analyses showed that  $A\beta$  reaches the liver, spleen and the mesenteric lymph nodes via lymphatic drainage. Interestingly, labelled  $A\beta_{17-28}$  peptide was detected at 1-day post-injection in the insoluble brain fractions of both groups of mice. The analyses indicate that the transgenic mice rapidly metabolized  $^{13}C$ -Lys from the donor extracts and incorporated the labelled essential amino acid into the de novo generated  $A\beta$ . Therefore, in contrast to previous studies, the data do not support the notion that labelled  $A\beta$ , from peripheral injections, actually enters the brain. The authors conclude that these findings argue against the transmission of cerebral  $A\beta$  pathology via peripheral administration of  $A\beta$  aggregates.

This reviewer finds the presented data relevant and interesting. The high sensitivity of the developed methodology for the detection of labelled  $A\beta$  supports the robustness of the observations and conclusions.

We sincerely thank the reviewer for her/his support of our data.

#### Main comment:

1- As mentioned in the discussion, the results are in conflict with previous reports; including the recent study by Morales et al. (2021) which uses very similar methodology in the investigation of induced cerebral  $A\beta$  pathology following peripheral administration of misfolded  $A\beta$ .

The authors indicate that "Our findings imply that accelerated cerebral  $\beta$ -amyloidosis previously observed after peripheral injection of  $A\beta$ -containing brain extract or blood into APPtg mouse models (Burwinkel et

al.,2018; Eisele et al., 2014; Eisele et al., 2010; Morales et al., 2021; Morales et al, 2020) was caused by other factors present in the donor material rather than by seeding from the periphery." And suggest for instance inflammatory factors.

However, this reviewer wonders whether the type of 'A $\beta$  seeds' injected in the different studies differ and may explain the discrepancies.

Have the authors tested the amyloidogenic (seeding) activity of the homogenate samples that were injected? How do they compare to other reported seeds?

In Morales et al (2021), samples derived from an Alzheimer's (AD) brains were used in the studies. Have the authors tested the seeding activity of the used extracts with those derived from the AD human brain. The authors should convincingly demonstrate that the injected fractions are 'biologically active' in regards to their seeding activity.

The reviewer raises a very important concern. The APPTg brain extract injected in our study was generated by homogenizing brains from 100-175-day-old APP/PS1 mice (Radde et al., 2006, <https://doi.org/10.1038/sj.embor.7400784>) and diluting the homogenates with 1  $\mu$ l PBS per mg homogenate. Morales et al., 2021 used 18-20-month-old Tg2576 mice as brain donors, whereas Eisele et al., 2014 used 18-30-month-old APP23 and APP/PS1 mice, with brain extracts containing < 10% of extract derived from APP/PS1 mice. Both studies generated more diluted brain extracts at 10% w/v corresponding to 9  $\mu$ l PBS per mg brain.

The APP/PS1 model used in our study starts depositing A $\beta$  at 1.5 months of age, whereas Tg2576 mice and APP23 mice show first A $\beta$  deposits at 8-10 months and 6-7 months of age, respectively. Our donor mice were sacrificed at a younger age as compared to previous studies not only because of the faster A $\beta$  deposition in the APP/PS1 model but also because longer labeling durations would not have been feasible due to the immensely high costs of the <sup>13</sup>C-Lys-labeled diet (~8000 €/kg). To compensate for the younger age of the donor mice, we used less diluted brain extracts for injection. Those extracts had A $\beta$  concentrations of 2.9-8.5 ng A $\beta$ / $\mu$ l corresponding to 580-1700 ng intraperitoneally injected A $\beta$ . Eisele et al., 2014 injected brain extracts containing 10-20 ng A $\beta$ / $\mu$ l and Morales et al., 2021 estimated the amount of intraperitoneally injected A $\beta$  to be 171.8 ng. Thus, A $\beta$  levels in our brain extracts are comparable to previous studies. We added "or estimating the amount of intraperitoneally injected A $\beta$  to be 171.8 ng (corresponding to an A $\beta$  concentration of 1.7 ng/ $\mu$ l) (Morales et al., 2021)" (Page 12, line 264) to the discussion section.

Moreover, brain extracts generated from APP/PS1 mice have repeatedly been shown to induce A $\beta$  seeding when injected intracerebrally into young APP/PS1 or APP23 mice (Meyer-Luehmann et al., 2006, DOI: [10.1126/science.1131864](https://doi.org/10.1126/science.1131864), Heilbronner et al., 2013, <https://doi.org/10.1038/embor.2013.137>), even when the APP/PS1 donor mice were only 3 months old (Ye et al., 2017, <https://doi.org/10.15252/embr.201744067>). Thus, "A $\beta$  seeds" derived from APP/PS1 mice have demonstrated seeding activity *in vivo*.

However, the main objective of this study was to investigate whether "A $\beta$  seeds" reached the brain from the periphery. While we were able to detect injected A $\beta$  in peripheral organs and cells by means of not only mass spectrometry but also immunoassay and in case of the liver, immunohistochemistry, - thereby further arguing in favor of the biological activity of the injected brain extracts - our data point against *brain penetration* of A $\beta$ . The fact that we *did not* observe accelerated A $\beta$  deposition even at 8 months after intraperitoneal injection of APPTg brain extract is a secondary observation that is in accordance with the lack of brain penetration of A $\beta$ . A possible explanation for the discrepancy with previous studies may be the very fast rate of A $\beta$  deposition in APP/PS1 host mice masking any acceleration of plaque formation caused by still unknown factors in APPTg brain extracts. We added the following sentences to the discussion section: "However, we did not observe accelerated cerebral  $\beta$ -amyloidosis in our study. This discrepancy with previous studies may be explained by differences in the rate of A $\beta$  deposition in the different APPTg models used as host mice. While APP23 and Tg2576 mice used in previous studies start depositing A $\beta$  at 6-7 months

(Sturchler-Pierrat et al, 1997) and 8-10 months (Kawarabayashi et al, 2001), respectively, APP/PS1 mice used in our study already show first A $\beta$  deposits at 1.5 months (Radde et al., 2006), potentially masking any accelerated plaque formation caused by still unknown factors in the donor material.” (Page 13, line 276)

Regarding the use of extracts derived from human AD brains, we did not include this option in our study as it precludes stable isotope labeling and tracking of A $\beta$ . Morales et al., 2021 used brain extracts derived from Tg2576 mice for all intraperitoneal injection experiments. They merely used brain extracts derived from an AD patient for oral administration and did not demonstrate any effect on cerebral A $\beta$  pathology via this application route. Additionally, Meyer-Luehmann et al., 2006 (DOI: [10.1126/science.1131864](https://doi.org/10.1126/science.1131864)) reported comparable intracerebral seeding activity between brain extracts from APPTg mice and AD patients.

To provide further evidence for the seeding activity of our APPTg brain extracts, we performed an *in vitro* seeding assay, more specifically the thioflavin T (ThT) fluorescence assay. We first tested various dilutions of the crude APPTg and non-tg brain extracts and detected very high initial fluorescence masking any increase of fluorescence over time associated with A $\beta$  aggregation. Thus, we isolated A $\beta$ 42 fibrils from APPTg extract and subjected non-tg extract to the same isolation protocol. A $\beta$ 42 fibrils extracted from APPTg extract exhibited seeding activity in a concentration-dependent manner while isolate from non-tg brain extract had a delaying effect on A $\beta$  aggregation. Thereby, we present *in vitro* evidence for the presence of seeding-competent A $\beta$  aggregates in our APPTg extract.

We added an additional Expanded View figure (Figure EV1) as well as the following sentences to the results section: “Additionally, we isolated A $\beta$ 42 fibrils from unlabeled APPTg extract and tested their *in vitro* seeding activity by thioflavin T (ThT) fluorescence assay. A $\beta$ 42 fibrils extracted from APPTg brain extract exerted a concentration-dependent seeding effect on A $\beta$ 42 aggregation (Figure EV1A) whereas isolate generated from non-tg brain extract delayed A $\beta$ 42 aggregation kinetics (Figure EV1B). Seeded A $\beta$ 42 fibrils presented a heterogenous morphology (Figure EV1C,D) while A $\beta$ 42 fibrils aggregated without the presence of seeds displayed a more homogenous morphology (Figure EV1E).” (Page 5, line 102). We also provided additional information in the materials and methods section: “

#### Fibril extraction from brain extracts

Fibrils were extracted using a modified method from a recent study (Kollmer et al., 2019). Unlabeled APPTg brain extract (300  $\mu$ l) was diluted with an equal volume of Tris calcium buffer (20mM Tris, 138mM NaCl, 2mM CaCl<sub>2</sub>, 0.1% NaN<sub>3</sub>, pH 8) and centrifuged at 21,000 x g for 30 minutes. The pellet was re-suspended in 1 ml Tris calcium buffer and 50  $\mu$ l of Collagenase (5 mg/ml) and 10  $\mu$ l of DNase I were added. The solution was vortexed, incubated overnight at 37 °C and centrifuged at 21,000 x g for 30 minutes. The pellet was dissolved in 1 ml wash buffer (50 mM Tris, 10mM EDTA, pH 8) and 40  $\mu$ l of 10 % SDS was added. The solution was incubated at 37°C for 30 minutes and centrifuged. This step was repeated twice and two further washing steps of the pellet were performed in wash buffer without SDS. Finally, the pellet containing fibrils was dissolved in 50  $\mu$ l of 20 mM sodium phosphate buffer, 0.2 mM EDTA pH 8.0, and used for further experiments. Unlabeled non-tg brain extract was processed identically as control.

#### Dot blot assay

The concentration of A $\beta$  in fibril extract was estimated from dot blot using A $\beta$ 42 monomer as reference. Fibril extract generated from APPTg brain extract was sonicated and spotted on a nitrocellulose membrane in different volumes (1,2,3, and 4  $\mu$ l, respectively). 4  $\mu$ l of A $\beta$ 42 in different concentrations (1,2,3,6, and 8  $\mu$ M, respectively) was spotted as standard. The membrane was air-dried, blocked with blocking buffer (intercept® blocking buffer, LI-COR, Lincoln, USA) and incubated overnight at 4 °C with primary anti-A $\beta$  antibody (6E10, anti-



mouse, 1:5,000, BioLegend™). The membrane was washed thrice with PBS-T, followed by incubation with secondary anti-mouse antibody (IRDye 800 CW, 1:20,000, LI-COR) for 60 minutes at 25 °C. The membrane was washed thrice with PBS-T and developed using Odyssey® DLx Imaging System. Blot analysis was performed for estimation of A $\beta$  concentration using Image J.

#### Thioflavin T fluorescence assay

To test the seeding activity of fibrils extracted from APPTg brain extract, a Thioflavin T (ThT) fluorescence assay was performed. 20  $\mu$ l of sodium phosphate buffer (20 mM, 0.2 mM EDTA, pH 8.0) containing 3  $\mu$ M A $\beta$ 42 and 10  $\mu$ M ThT was added to 384-well plates along with different volumes (1,2,3,5,8,10, and 20  $\mu$ l, respectively) of isolate generated from APPTg or non-tg brain extracts. Excitation filter at 440 nm and emission filter at 480 nm were selected and fluorescence was recorded at quiescent conditions at 37 °C using a fluorimeter (FLUOStar Galaxy from BMG Labtech, Offenberg, Germany). The fluorescence data was plotted with respect to time after subtracting the minimum fluorescence value for each sample from all data points.

#### Transmission electron microscopy

To visualize the morphology of seeded A $\beta$ 42 fibrils at the aggregation kinetic end points, transmission electron microscopy (TEM) was performed. 5  $\mu$ l of aggregated samples from 384-well plates were spotted on a 400 mesh formvar/carbon coated copper grid. Samples were washed twice with 10  $\mu$ l of MQ water and stained with 1% uranyl formate. TEM (FEI Tecnai 12 Spirit BioTWIN, operated at 100 kV) images were recorded using a 2 k  $\times$  2 k Veleta CCD camera (Olympus Soft Imaging Solutions, GmbH, Münster, Germany). For each sample, 10-15 images were taken at a magnification of 20,000 x – 43,000 x.

” (Page 20, line 446)

#### Referee #2:

This report is a tour-de-force of a very important, but challenging, question: does peripheral amyloid-beta get into the CNS or contribute to the risk of CNS amyloidosis?

The authors use a series of advanced techniques to address this question at multiple levels and should be congratulated on a thoughtful and thorough approach.

We are sincerely grateful to the reviewer for her/his enthusiastic endorsement and support of our research.

Major critiques are:

1) The results and discussion of peripheral amounts and locations of injected amyloid don't directly address the hypothesis framed by this manuscript, but do provide additional information on where injected amyloid goes in cellular components. The authors could consider making these descriptions supplemental or secondary to the main CNS findings.

For example, the description of Amyloid-beta 42 detected in mononuclear cells after IP injection of unlabeled tg and non-tg brain homogenates adds little to the discussion. Because endogenous, murine Amyloid-beta is produced at much lower levels than in APP/PS1 transgenic mice, it seems surprising that "In blood plasma, A $\beta$ 42 levels were comparable between mice injected with APPTg brain extract and those injected with non-tg brain extract at all time points". This should be more directly addressed - why isn't it higher from tg tissues with much higher amyloid amounts?

Because the main hypothesis, 'does IP-injected amyloid-beta reach the brain and imply transmissibility similar to prion diseases', doesn't need the measurements in blood plasma to be complete, the authors could simply move the part of the paragraph that begins, "In blood plasma" . . . ) to supplemental.

Additionally, the results hypothesize about how the IP injection is cleared from the peritoneum, but don't fully describe the exact identity of the "peritoneal cells": were these mesothelial cells? Macrophages? Lymphocytes? Other? Similarly, the "mononuclear cells" in the blood plasma. In addition, we know that amyloid-beta in blood plasma can be transported via binding to soluble transport proteins such as LRP-1 (see work by Zlokovic), so simply measuring the amount of the peptide in cells does not necessarily capture the entire amount in plasma. These should all be added to supplement or discussion.

The reviewer makes a valid point by suggesting that we could consider making the peripheral data supplementary or secondary. However, we believe that these data support the validity of our experimental approach, showing that injected A $\beta$  can be tracked even at very low amounts in peripheral tissues, and therefore should remain in the main text. Moreover, we decided to describe the main CNS findings at the end of the results section as they represent the key element and highlight of the work.

Our finding that mice injected with APPtg brain extract do not have higher blood plasma A $\beta$ 42 levels than mice injected with non-tg brain extract is consistent with previous work by Eisele et al., 2014 (<https://doi.org/10.1523/JNEUROSCI.1608-14.2014>) who did not find differences in blood plasma A $\beta$  levels after intraperitoneal injection of APPtg brain extract but detected A $\beta$  in the cellular blood fraction in monocytes. This implies that injected A $\beta$  is not present in appreciable amounts in blood plasma. Therefore, we performed a separate experiment isolating mononuclear cells from whole blood by Ficoll gradient. To make it clear that these cells were isolated from whole blood and not from plasma, we modified the following sentence in the method section: "~~In a subset of animals separate experiment (n = 2-3 per time point at 5 h – 7 d after APPtg extract injection, n = 1 per time point at 5 h – 7 d after non-tg extract injection),~~ EDTA-anticoagulated blood was taken by intra-cardiac puncture (n = 2-3 mice per time point at 5 h – 7 d after APPtg extract injection, n = 1 per time point at 5 h – 7 d after non-tg extract injection) and mononuclear cells were isolated from blood samples using Ficoll-Paque PREMIUM 1.084 (GE Healthcare) according to the manufacturer's instructions." (Page 24, line 537). We did not confirm the identity of the mononuclear blood cells but according to the manufacturer's handbook ([https://us.vwr.com/assetsvc/asset/en\\_US/id/16286835/contents](https://us.vwr.com/assetsvc/asset/en_US/id/16286835/contents)), these cells consist of lymphocytes and monocytes. We added "i.e. lymphocytes and monocytes" (Page 8, line 166) to the results section. We detected more A $\beta$ 42 in mononuclear cells isolated from mice injected with APPtg extract than in mononuclear cells isolated from mice injected with non-tg extract during the first 24 h after injection. Thus, we concluded that injected A $\beta$  was transported by mononuclear blood cells. However, we cannot rule out that injected A $\beta$  is present in blood plasma at levels below the detection limit of our immunoassay or that binding of A $\beta$  to soluble transport proteins reduces A $\beta$  detection in the immunoassay. We added the following sentences to the discussion section: "~~In further concordance with this previous study, our data imply that injected A $\beta$  is present in mononuclear blood cells but not in blood plasma during the first day after injection, suggesting that A $\beta$  is initially transported to peripheral organs by mononuclear blood cells. However, we cannot rule out that injected A $\beta$  is present in blood plasma at levels below the detection limit of the immunoassay or that binding of A $\beta$  to soluble transport proteins such as low-density lipoprotein receptor-related protein-1 (Sagare et al, 2007) leads to epitope masking, thereby reducing A $\beta$  detection in the immunoassay.~~" (Page 13, line 292)

We inspected Giemsa-stained peritoneal cells and identified predominantly lymphocytes and to a lesser extent macrophages and mesothelial cells. We did not see any obvious

differences in the cell composition or amount between mice injected with APPTg extract and mice injected with non-tg extract. Nor did the cell composition or amount change over time at later time points after injection. However, at 5 h and occasionally at 1 d after injection, the injected brain material was still visible. We added “In the peritoneal cells **consisting predominantly of lymphocytes and to a lesser extent of macrophages and mesothelial cells**” (Page 8, line 161) to the results section. Furthermore, we added the following information to the methods section: “**Ten microliters of resuspended peritoneal cells were air-dried overnight on Superfrost® Plus slides at room temperature. Slides were fixed in methanol for 5 minutes and subjected to Giemsa staining to identify the composition of the peritoneal cells.**” (Page 24, line 533). We decided not to add an additional Figure with images of the peritoneal cells to the manuscript as it would not add anything to our findings. However, please find here a representative image of the peritoneal cells of an animal at 3 d after injection of APPTg brain extract.

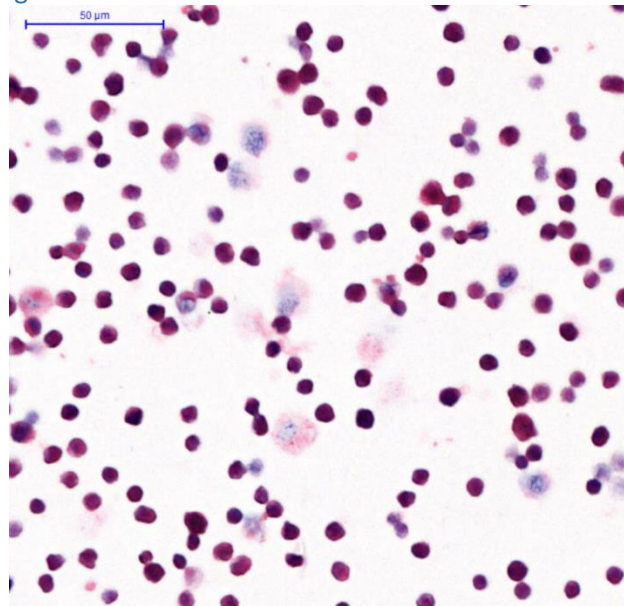

2) the tg and non-tg groups were administered different durations of the stable isotope-labeled diet for the main experiments, acknowledging that the authors did, in later experiments, administer the diet for 100 d to non-tg mice to match the labeled diet duration of the original group of tg mice. The authors should move the findings of the non-tg mouse group fed the labeled diet for only 10 days to supplement clearly identifying the difference in labeling as not being comparable. Figure 4G seems to provide some of the most convincing evidence that the labeled amino acid, but not the peptide, is being taken up and incorporated (hence not supporting the hypothesis that amyloid-beta in the periphery enters the brain).

We agree with the reviewer that our experimental setups first using brain donors with different labeling durations and later brain donors with equal labeling durations is rather confusing. When first generating the labeled negative controls, we tried to plan our feeding durations in the most economical way possible due to the immensely high costs of the <sup>13</sup>C-Lys-labeled diet (~8000 €/kg) and decided on a labeling duration of 10 days because the average life time of brain proteins had been reported to be 9 days. This labeling duration of 10 d resulted in 83% overall labeling of the brain proteome. We were very surprised by the results of the injection experiments, as we had not expected such fast label incorporation into Aβ, nor had we anticipated that an overall labeling difference of 97% in APPTg extract vs 83% in non-tg extract would result in a significant difference in the abundance of labeled Aβ. We added “**Unequal labeling duration of APPTg and non-tg donors**” to the graph titles of Fig. 4B and “**Equal labeling duration of APPTg and non-tg donors**” to the graph title of Fig. 4G to point out differences in experimental setups in a clearer manner. However, we would like to

leave the data of the main injection experiments in Fig. 4 for the following reasons. 1) Fig. 4B includes a variety of time points from 1-100 d after injection, pointing to incorporation of the labeled amino acid from day 1 after injection with a slow but steady increase until 100 d after injection. 2) Fig. 4B argues in favor of a “dose-dependent” incorporation of the labeled amino acid, i.e. the higher the percentage of labeled brain proteins in the donor extract, the higher the abundance of labeled A $\beta$  in the injected mice. 3) Figure 4 as a whole shows the entire evolution of the experiments leading to the main conclusion of the manuscript that peripherally injected A $\beta$  does not reach the brain while the mice incorporate labeled amino acids from the injected brain extracts.

3) the hypothesis that proteases in the liver help break down amyloid-beta seems unnecessary and unproven (most protein catabolism occurs in the stomach and small intestine), and at most should be included as a speculation in discussion.

We agree with the reviewer that this point is rather a speculation than a hypothesis, for which we do not have proof. We revised the wording as follows: “we provide evidence that peripherally injected A $\beta$  does not penetrate the brain but ~~is may be~~ metabolized ~~along with other labeled proteins~~” (Page 10, line 226). “We ~~hypothesize speculate~~ that <sup>13</sup>C-Lys-containing proteins and peptides from the injected donor extract ~~is may be~~ metabolized ~~by proteases in the liver in the periphery~~, resulting in release of <sup>13</sup>C-Lys – an essential amino acid – into the bloodstream. From there, <sup>13</sup>C-Lys ~~is may be~~ transported into the brain and used for *de novo* production of A $\beta$ .” (Page 11, line 246).

4) the absolute lack of <sup>13</sup>C-labeled Lys in the soluble (TBS) fraction (Figure 4A) as opposed to the unlabeled 17-28 fragment seems odd when it is apparent in the insoluble fraction rather quickly (1 d). The overall proportion of soluble vs. insoluble amyloid beta is generally low - so maybe it was simply the limit of detection in this case? The authors should explain this apparent discrepancy.

We agree with the reviewer that the most likely explanation for this discrepancy is that soluble <sup>13</sup>C-Lys A $\beta$  is below the limit of detection as the abundance of soluble unlabeled A $\beta$  is already very low. We added the following sentences to the discussion section: “While we observed incorporation of <sup>13</sup>C-Lys into insoluble A $\beta$ , we did not detect <sup>13</sup>C-Lys A $\beta$  in the soluble brain fraction at any time point. This discrepancy is most likely attributable to the proportion of soluble to insoluble A $\beta$  in our brain samples, with soluble unlabeled A $\beta$  being detected with an abundance 1,000-10,000-fold lower than insoluble unlabeled A $\beta$ . Given that this low abundance of soluble unlabeled A $\beta$  was already close to the limit of detection and that insoluble <sup>13</sup>C-Lys A $\beta$  was detected with an abundance 1,000-fold lower than insoluble unlabeled A $\beta$ , the abundance of soluble <sup>13</sup>C-Lys A $\beta$  would be below the limit of detection in our study.” (Page 11, line 250).

Minor critiques are:

1) a parallel analysis of other proteins that would have incorporated the <sup>13</sup>C-Lys would help support this claim that <sup>13</sup>C-Lys is transported via bloodstream to the brain as an amino acid, where in the brain itself, it is incorporated into a variety of proteins as they are synthesized. Can the authors search their mass spec data and find labeled signatures of other proteins (e.g. apolipoprotein E, which is present in abundant amounts - see <https://doi.org/10.1371/journal.pone.0038013>)?

We thank the reviewer for this helpful suggestion. However, our MS methodology was designed to specifically detect <sup>13</sup>C-Lys A $\beta$ 17-28 *at very low levels*. Our strategy includes A $\beta$  enrichment by immunoprecipitation and specific detection of the four most intensive transitions of A $\beta$ 17-28 by MRM. Thus, there are no signatures of other proteins in our MS

data. To follow the reviewer's suggestion, we measured the insoluble fraction without previous immunoprecipitation but with trypsin digestion on Orbitrap QExactive HF. While we were able to sequence over 4700 proteins and quantify over 3000 of them with  $FDR < 0.01$ , we did not detect  $^{13}\text{C}$ -Lys A $\beta$  fragments or any other  $^{13}\text{C}$ -Lys-containing peptides. This is attributable to the fact that  $^{13}\text{C}$ -Lys A $\beta$  and possibly other proteins that may have incorporated  $^{13}\text{C}$ -Lys are present in extremely low amounts. To detect labeled signatures of other proteins at very low levels, we would have to enrich these proteins specifically by immunoprecipitation, digest them, identify the most easily detectable fragments that would have to include  $^{13}\text{C}$ -Lys, and design a new MRM-based strategy detecting the most intensive transitions. This task would take a long time to complete and would be beyond the scope of the study.

2) Consider expanding, with perhaps a Figure illustrating the phenomenon, of the finding that stable-isotope labeling in these Tg mice confirms the findings of the Michno et al 2021 study: in preparation of the labeled homogenates, the authors also noted that the earlier labeling begins, the lower the amount of insoluble A $\beta$  that is not subject to dynamic turnover, and the higher the label incorporation into A $\beta$ , which highlights the importance of an early start of therapies promoting A $\beta$  clearance - showing that label incorporation into A $\beta$  is highest when labeling starts before plaque onset.

We thank the reviewer for this excellent suggestion. We added an illustration to Figure 1 (referred to as Figure 1E while Figure 1E was changed to Figure 1F) and the following description to the figure legend: "E Illustration of  $^{13}\text{C}$ -Lys incorporation into A $\beta$  depending on the starting point of labeling in APtg mice. The later labeling starts, the higher is the amount of already generated, insoluble A $\beta$  that is not metabolized anymore and consequently, not available for label incorporation. The earlier labeling starts, the higher is the fraction of newly produced A $\beta$  incorporating the label." (Page 34, line 829).

3) Although peak intensity of the amyloid-beta 17-28 fragment was highest and therefore chosen as a surrogate for total amyloid-beta, considering choosing the second most intense peak and analyzing it in parallel (perhaps a fragment with the Lys at position 16 as well as C-terminal end at 42).

To reduce the oligomerization/aggregation propensities of hydrophobic full-length A $\beta$  peptides and their known "tailing effects" in reversed phase chromatography ([doi.org/10.1021/acs.biochem.8b00393](https://doi.org/10.1021/acs.biochem.8b00393)), we chose to perform the trypsin digestion experiments in order to generate shorter, more soluble A $\beta$  fragments. In our initial experiments, we utilized both synthetic A $\beta$ 1-40 and A $\beta$ 1-42 peptides, found as components of A $\beta$  deposits in the APP/PS1 brain (see compendium of tested conditions at: <http://urn.fi/URN:NBN:fi:aalto-201712187965>). Digestion of A $\beta$ 1-40 and A $\beta$ 1-42 peptides resulted in similar digestion pattern, yielding fragments of various length corresponding mostly to expected  $m/z$  A $\beta$ 17-28 and A $\beta$ 1-16 peptides. The very hydrophobic C-terminal fragments of A $\beta$ , ending at position 42 were detected in MALDI MS tryptic digestion experiments with synthetic A $\beta$ 1-42 peptide with very low intensities. Based on these observations, the ion with the highest intensity, corresponding to A $\beta$ 17-28  $[\text{MH}]^+$  ( $m/z$  1325.818), with good solubility and high recovery following several steps of IP-based MS procedure was selected as a surrogate to measure the total A $\beta$  content. This strategy to utilize this peptide has been independently described by others (DOI: [10.1016/j.aca.2014.06.024](https://doi.org/10.1016/j.aca.2014.06.024) and patented [patent/EP2575596B1](https://patent/EP2575596B1)). We have not tested the less intensive A $\beta$ 1-16 peptide since unlike A $\beta$  17-28 it could also not be detected in TBS-soluble brain fractions (S1) from APP/PS1 animals, in Orbitrap QExactive HF Plus MS/MS measurements. Consequently, we specifically designed the MRM-based strategy allowing detection and quantification of the four most intensive transitions of easily detectable A $\beta$ 17-28 peptide to be followed in all experiments. Due to this selective, A $\beta$ 17-28-targeted

strategy, it is not possible to follow the reviewer's suggestion and analyze A $\beta$ 1-16 fragments retrospectively.

Dear Prof. Pahnke

Thank you for the submission of your revised manuscript to EMBO reports. As my colleague Esther Schnapp is currently traveling, I have temporarily taken over the handling of your manuscript. We have now received the full set of referee reports (copied below) and both referees are very positive about the study and support publication without further revision.

Browsing through the manuscript myself, I noticed a few editorial things that we need before we can proceed with the official acceptance of your study.

- We plan to publish your manuscript in the Report format. For a Scientific Report we require that results and discussion sections are combined in a single chapter called "Results & Discussion" and kindly ask you to do this for your manuscript. For more details please refer to our guide to authors: <http://www.embopress.org/page/journal/14693178/authorguide#researcharticleguide>

- Please move the data availability section to the end of Materials and Methods.

- Data availability: The current link resolves to a data sharing platform, OSF. We generally ask authors to deposit data in one of the publicly accessible databases, such as Pride or Peptide Atlas for mass spectrometry data. Please deposit your data in one of these databases and add this link and the name of the database to the Data availability section. If the data on OSF contain more raw data than the proteomics, it could remain part of the section too. Please contact us, if you want to discuss this further.

- Please complete all information on funding in our online submission system. Currently these grants (listed in the manuscript) are missing: HelseSØ/ Norway 2022046, European Union's Horizon 2020 research and innovation programme under grant agreement #643417 (JPco-fuND), ERA-NET NEURON (ERA-NET MicroSynDep project); AKA #318857 - Finland, Svenska Sällskapet för Medicinsk Forskning, FORMAS, Åke Wiberg, Alzheimerfonden, Hedlund, Foundation for Geriatric Diseases and Åhlen Foundation

- Please update the 'Conflict of interest' paragraph to our new 'Disclosure and competing interests statement'. For more information see <https://www.embopress.org/page/journal/14693178/authorguide#conflictsofinterest>

- Dataset EV1-3: Please add the names, i.e., Dataset EVx to the legends in the .xls files.

- We noticed that Table EV2 is called out before Table EV1 and recommend renaming them.

- Tables EV1 and EV2 need to be removed from the manuscript and uploaded as separate files

- Figure EV2: Please add scale bars to the zoomed images and define their size in the figure legend.

- I attach to this email a related manuscript file with comments by our data editors. Please address all comments and upload a revised file with tracked changes with your final manuscript submission. I have also taken the liberty to make some changes to the Abstract. Could you please review it?

We look forward to seeing a final version of your manuscript as soon as possible.

With kind regards,

Martina Rembold, PhD  
Senior Editor  
EMBO reports

\*\*\*\*\*

Referee #1:

The authors have addressed satisfactorily the point raised by this reviewer and revised the manuscript accordingly.

Referee #2:

The authors have done a good job to address the questions the reviewers had, as well as the additional experiment they did to address the Referee #1 concern in the text and with additional data in Figure legends 3 and 4 about exactly how many mice at

which time points were used. We have no other major concerns.



The authors have addressed all minor editorial requests.

Prof. Jens Pahnke  
University of Oslo  
Department of Pathology  
Sognsvannsveien 20  
Oslo 0318  
Norway

Dear Prof. Pahnke,

I am very pleased to accept your manuscript for publication in the next available issue of EMBO reports. Thank you for your contribution to our journal.

At the end of this email I include important information about how to proceed. Please ensure that you take the time to read the information and complete and return the necessary forms to allow us to publish your manuscript as quickly as possible.

As part of the EMBO publication's Transparent Editorial Process, EMBO reports publishes online a Review Process File to accompany accepted manuscripts. As you are aware, this File will be published in conjunction with your paper and will include the referee reports, your point-by-point response and all pertinent correspondence relating to the manuscript.

If you do NOT want this File to be published, please inform the editorial office within 2 days, if you have not done so already, otherwise the File will be published by default [contact: emboreports@embo.org]. If you do opt out, the Review Process File link will point to the following statement: "No Review Process File is available with this article, as the authors have chosen not to make the review process public in this case." Please note that the author checklist will still be published even if you opt out of the transparent process.

Thank you again for your contribution to EMBO reports and congratulations on a successful publication. Please consider us again in the future for your most exciting work.

Best regards,  
Esther

Esther Schnapp, PhD  
Senior Editor  
EMBO reports

\*\*\*\*\*

THINGS TO DO NOW:

Please note that you will be contacted by Wiley Author Services to complete licensing and payment information. The required 'Page Charges Authorization Form' is available here: [https://www.embopress.org/pb-assets/embo-site/er\\_apc.pdf](https://www.embopress.org/pb-assets/embo-site/er_apc.pdf)

You will receive proofs by e-mail approximately 2-3 weeks after all relevant files have been sent to our Production Office; you should return your corrections within 2 days of receiving the proofs.

Please inform us if there is likely to be any difficulty in reaching you at the above address at that time. Failure to meet our deadlines may result in a delay of publication, or publication without your corrections.

All further communications concerning your paper should quote reference number EMBOR-2021-54405V3 and be addressed to [emboreports@wiley.com](mailto:emboreports@wiley.com).

Should you be planning a Press Release on your article, please get in contact with [emboreports@wiley.com](mailto:emboreports@wiley.com) as early as possible, in order to coordinate publication and release dates.

## EMBO Press Author Checklist

|                                        |
|----------------------------------------|
| Corresponding Author Name: Jens Pahnke |
| Journal Submitted to: EMBO Reports     |
| Manuscript Number: EMBOR-2021-54405V1  |

### USEFUL LINKS FOR COMPLETING THIS FORM

- [The EMBO Journal - Author Guidelines](#)
- [EMBO Reports - Author Guidelines](#)
- [Molecular Systems Biology - Author Guidelines](#)
- [EMBO Molecular Medicine - Author Guidelines](#)

### Reporting Checklist for Life Science Articles (updated January 2022)

This checklist is adapted from Materials Design Analysis Reporting (MDAR) Checklist for Authors. MDAR establishes a minimum set of requirements in transparent reporting in the life sciences (see Statement of Task: [10.31222/osf.io/9sm4x](https://doi.org/10.31222/osf.io/9sm4x)). Please follow the journal's guidelines in preparing your manuscript.

**Please note that a copy of this checklist will be published alongside your article.**

### Abridged guidelines for figures

#### 1. Data

The data shown in figures should satisfy the following conditions:

- the data were obtained and processed according to the field's best practice and are presented to reflect the results of the experiments in an accurate and unbiased manner.
- ideally, figure panels should include only measurements that are directly comparable to each other and obtained with the same assay.
- plots include clearly labeled error bars for independent experiments and sample sizes. Unless justified, error bars should not be shown for technical replicates.
- if  $n < 5$ , the individual data points from each experiment should be plotted. Any statistical test employed should be justified.
- Source Data should be included to report the data underlying figures according to the guidelines set out in the authorship guidelines on Data Presentation.

#### 2. Captions

Each figure caption should contain the following information, for each panel where they are relevant:

- a specification of the experimental system investigated (eg cell line, species name).
- the assay(s) and method(s) used to carry out the reported observations and measurements.
- an explicit mention of the biological and chemical entity(ies) that are being measured.
- an explicit mention of the biological and chemical entity(ies) that are altered/varied/perturbed in a controlled manner.
- the exact sample size (n) for each experimental group/condition, given as a number, not a range;
- a description of the sample collection allowing the reader to understand whether the samples represent technical or biological replicates (including how many animals, litters, cultures, etc.).
- a statement of how many times the experiment shown was independently replicated in the laboratory.
- definitions of statistical methods and measures:
  - common tests, such as t-test (please specify whether paired vs. unpaired), simple  $\chi^2$  tests, Wilcoxon and Mann-Whitney tests, can be unambiguously identified by name only, but more complex techniques should be described in the methods section;
  - are tests one-sided or two-sided?
  - are there adjustments for multiple comparisons?
  - exact statistical test results, e.g., P values = x but not P values < x;
  - definition of 'center values' as median or average;
  - definition of error bars as s.d. or s.e.m.

**Please complete ALL of the questions below.**  
Select "Not Applicable" only when the requested information is not relevant for your study.

### Materials

| Section                                                                                                                                                                                                       | Information included in the manuscript? | In which section is the information available?<br><small>(Reagents and Tools Table, Materials and Methods, Figures, Data Availability Section)</small> |
|---------------------------------------------------------------------------------------------------------------------------------------------------------------------------------------------------------------|-----------------------------------------|--------------------------------------------------------------------------------------------------------------------------------------------------------|
| <b>Newly Created Materials</b>                                                                                                                                                                                |                                         |                                                                                                                                                        |
| New materials and reagents need to be available; do any restrictions apply?                                                                                                                                   | Not Applicable                          |                                                                                                                                                        |
| <b>Antibodies</b>                                                                                                                                                                                             |                                         |                                                                                                                                                        |
| For <b>antibodies</b> provide the following information:<br>- Commercial antibodies: RRID (if possible) or supplier name, catalogue number and/or clone number<br>- Non-commercial: RRID or citation          | Yes                                     | Materials and Methods                                                                                                                                  |
| <b>DNA and RNA sequences</b>                                                                                                                                                                                  |                                         |                                                                                                                                                        |
| Short novel DNA or RNA including primers, probes: provide the sequences.                                                                                                                                      | Not Applicable                          |                                                                                                                                                        |
| <b>Cell materials</b>                                                                                                                                                                                         |                                         |                                                                                                                                                        |
| <b>Cell lines:</b> Provide species information, strain. Provide accession number in repository OR supplier name, catalog number, clone number, and/OR RRID.                                                   | Not Applicable                          |                                                                                                                                                        |
| <b>Primary cultures:</b> Provide species, strain, sex of origin, genetic modification status.                                                                                                                 | Not Applicable                          |                                                                                                                                                        |
| Report if the cell lines were recently <b>authenticated</b> (e.g., by STR profiling) and tested for mycoplasma contamination.                                                                                 | Not Applicable                          |                                                                                                                                                        |
| <b>Experimental animals</b>                                                                                                                                                                                   |                                         |                                                                                                                                                        |
| <b>Laboratory animals or Model organisms:</b> Provide species, strain, sex, age, genetic modification status. Provide accession number in repository OR supplier name, catalog number, clone number, OR RRID. | Yes                                     | Materials and Methods                                                                                                                                  |
| <b>Animal observed in or captured from the field:</b> Provide species, sex, and age where possible.                                                                                                           | Not Applicable                          |                                                                                                                                                        |
| Please detail <b>housing and husbandry conditions</b> .                                                                                                                                                       | Yes                                     | Materials and Methods                                                                                                                                  |
| <b>Plants and microbes</b>                                                                                                                                                                                    |                                         |                                                                                                                                                        |
| <b>Plants:</b> provide species and strain, ecotype and cultivar where relevant, unique accession number if available, and source (including location for collected wild specimens).                           | Not Applicable                          |                                                                                                                                                        |
| <b>Microbes:</b> provide species and strain, unique accession number if available, and source.                                                                                                                | Not Applicable                          |                                                                                                                                                        |
| <b>Human research participants</b>                                                                                                                                                                            |                                         |                                                                                                                                                        |
| If collected and within the bounds of privacy constraints report on age, sex and gender or ethnicity for all study participants.                                                                              | Not Applicable                          |                                                                                                                                                        |
| <b>Core facilities</b>                                                                                                                                                                                        |                                         |                                                                                                                                                        |
| If your work benefited from core facilities, was their service mentioned in the acknowledgments section?                                                                                                      | Not Applicable                          |                                                                                                                                                        |

### Design

| Study protocol                                                                                                                                            | Information included in the manuscript? | In which section is the information available?<br>(Reagents and Tools Table, Materials and Methods, Figures, Data Availability Section) |
|-----------------------------------------------------------------------------------------------------------------------------------------------------------|-----------------------------------------|-----------------------------------------------------------------------------------------------------------------------------------------|
| If study protocol has been <b>pre-registered</b> , provide DOI in the manuscript. For clinical trials, provide the trial registration number OR cite DOI. | Not Applicable                          |                                                                                                                                         |
| Report the <b>clinical trial registration number</b> (at ClinicalTrials.gov or equivalent), where applicable.                                             | Not Applicable                          |                                                                                                                                         |

| Laboratory protocol                                                                                     | Information included in the manuscript? | In which section is the information available?<br>(Reagents and Tools Table, Materials and Methods, Figures, Data Availability Section) |
|---------------------------------------------------------------------------------------------------------|-----------------------------------------|-----------------------------------------------------------------------------------------------------------------------------------------|
| Provide DOI OR other citation details if <b>external detailed step-by-step protocols</b> are available. | Not Applicable                          |                                                                                                                                         |

| Experimental study design and statistics                                                                                                                                                                                                                                                                                                   | Information included in the manuscript? | In which section is the information available?<br>(Reagents and Tools Table, Materials and Methods, Figures, Data Availability Section) |
|--------------------------------------------------------------------------------------------------------------------------------------------------------------------------------------------------------------------------------------------------------------------------------------------------------------------------------------------|-----------------------------------------|-----------------------------------------------------------------------------------------------------------------------------------------|
| Include a statement about <b>sample size</b> estimate even if no statistical methods were used.                                                                                                                                                                                                                                            | Yes                                     | Materials and Methods                                                                                                                   |
| Were any steps taken to minimize the effects of subjective bias when allocating animals/samples to treatment (e.g. <b>randomization procedure</b> )? If yes, have they been described?                                                                                                                                                     | Yes                                     | Materials and Methods                                                                                                                   |
| Include a statement about <b>blinding</b> even if no blinding was done.                                                                                                                                                                                                                                                                    | Yes                                     | Materials and Methods                                                                                                                   |
| Describe <b>inclusion/exclusion criteria</b> if samples or animals were excluded from the analysis. Were the criteria pre-established?<br>If sample or data points were omitted from analysis, report if this was due to attrition or intentional exclusion and provide justification.                                                     | Not Applicable                          | No data were excluded                                                                                                                   |
| For every figure, are <b>statistical tests</b> justified as appropriate? Do the data meet the assumptions of the tests (e.g., normal distribution)? Describe any methods used to assess it. Is there an estimate of variation within each group of data? Is the variance similar between the groups that are being statistically compared? | Yes                                     | Materials and Methods                                                                                                                   |

| Sample definition and in-laboratory replication                                                  | Information included in the manuscript? | In which section is the information available?<br>(Reagents and Tools Table, Materials and Methods, Figures, Data Availability Section) |
|--------------------------------------------------------------------------------------------------|-----------------------------------------|-----------------------------------------------------------------------------------------------------------------------------------------|
| In the figure legends: state number of times the experiment was <b>replicated</b> in laboratory. | Yes                                     | Figures                                                                                                                                 |
| In the figure legends: define whether data describe <b>technical or biological replicates</b> .  | Yes                                     | Figures                                                                                                                                 |

#### Ethics

| Ethics                                                                                                                                                                                                                                                                                                   | Information included in the manuscript? | In which section is the information available?<br>(Reagents and Tools Table, Materials and Methods, Figures, Data Availability Section) |
|----------------------------------------------------------------------------------------------------------------------------------------------------------------------------------------------------------------------------------------------------------------------------------------------------------|-----------------------------------------|-----------------------------------------------------------------------------------------------------------------------------------------|
| Studies involving <b>human participants</b> : State details of <b>authority granting ethics approval</b> (IRB or equivalent committee(s), provide reference number for approval).                                                                                                                        | Not Applicable                          |                                                                                                                                         |
| Studies involving <b>human participants</b> : Include a statement confirming that <b>informed consent</b> was obtained from all subjects and that the experiments conformed to the principles set out in the WMA Declaration of Helsinki and the Department of Health and Human Services Belmont Report. | Not Applicable                          |                                                                                                                                         |
| Studies involving <b>human participants</b> : For publication of <b>patient photos</b> , include a statement confirming that consent to publish was obtained.                                                                                                                                            | Not Applicable                          |                                                                                                                                         |
| Studies involving experimental <b>animals</b> : State details of <b>authority granting ethics approval</b> (IRB or equivalent committee(s), provide reference number for approval. Include a statement of compliance with ethical regulations).                                                          | Yes                                     | Materials and Methods                                                                                                                   |
| Studies involving <b>specimen and field samples</b> : State if relevant <b>permits</b> obtained, provide details of authority approving study; if none were required, explain why.                                                                                                                       | Not Applicable                          |                                                                                                                                         |

| Dual Use Research of Concern (DURC)                                                                                                                                                                                                                   | Information included in the manuscript? | In which section is the information available?<br>(Reagents and Tools Table, Materials and Methods, Figures, Data Availability Section) |
|-------------------------------------------------------------------------------------------------------------------------------------------------------------------------------------------------------------------------------------------------------|-----------------------------------------|-----------------------------------------------------------------------------------------------------------------------------------------|
| Could your study fall under dual use research restrictions? Please check biosecurity documents and list of <b>select agents and toxins</b> (CDC): <a href="https://www.selectagents.gov/sat/list.htm">https://www.selectagents.gov/sat/list.htm</a> . | Not Applicable                          |                                                                                                                                         |
| If you used a select agent, is the security level of the lab appropriate and reported in the manuscript?                                                                                                                                              | Not Applicable                          |                                                                                                                                         |
| If a study is subject to dual use research of concern regulations, is the name of the <b>authority granting approval</b> and <b>reference number</b> for the regulatory approval provided in the manuscript?                                          | Not Applicable                          |                                                                                                                                         |

#### Reporting

The MDAR framework recommends adoption of discipline-specific guidelines, established and endorsed through community initiatives. Journals have their own policy about requiring specific guidelines and recommendations to complement MDAR.

| Adherence to community standards                                                                                                                                                                                                                                                                                                     | Information included in the manuscript? | In which section is the information available?<br>(Reagents and Tools Table, Materials and Methods, Figures, Data Availability Section) |
|--------------------------------------------------------------------------------------------------------------------------------------------------------------------------------------------------------------------------------------------------------------------------------------------------------------------------------------|-----------------------------------------|-----------------------------------------------------------------------------------------------------------------------------------------|
| State if relevant guidelines or checklists (e.g., ICMJE, MIBBI, ARRIVE, PRISMA) have been followed or provided.                                                                                                                                                                                                                      | Yes                                     | Materials and Methods                                                                                                                   |
| For <b>tumor marker prognostic studies</b> , we recommend that you follow the <b>REMARK</b> reporting guidelines (see link list at top right). See author guidelines, under 'Reporting Guidelines'. Please confirm you have followed these guidelines.                                                                               | Not Applicable                          |                                                                                                                                         |
| For <b>phase II and III randomized controlled trials</b> , please refer to the <b>CONSORT</b> flow diagram (see link list at top right) and submit the <b>CONSORT</b> checklist (see link list at top right) with your submission. See author guidelines, under 'Reporting Guidelines'. Please confirm you have submitted this list. | Not Applicable                          |                                                                                                                                         |

#### Data Availability

| Data availability                                                                                                                                                                                 | Information included in the manuscript? | In which section is the information available?<br>(Reagents and Tools Table, Materials and Methods, Figures, Data Availability Section) |
|---------------------------------------------------------------------------------------------------------------------------------------------------------------------------------------------------|-----------------------------------------|-----------------------------------------------------------------------------------------------------------------------------------------|
| Have <b>primary datasets</b> been deposited according to the journal's guidelines (see 'Data Deposition' section) and the respective accession numbers provided in the Data Availability Section? | Yes                                     | Data Availability Section - DOI 10.17605/OSF.IO/VNGPM                                                                                   |
| Were <b>human clinical and genomic datasets</b> deposited in a public access-controlled repository in accordance to ethical obligations to the patients and to the applicable consent agreement?  | Not Applicable                          |                                                                                                                                         |
| Are <b>computational models</b> that are central and integral to a study available without restrictions in a machine-readable form? Were the relevant accession numbers or links provided?        | Not Applicable                          |                                                                                                                                         |
| If publicly available data were reused, provide the respective <b>data citations</b> in the reference list.                                                                                       | Not Applicable                          |                                                                                                                                         |
